# Supplementary material for: Bayesian Analysis of Record Statistic from the Inverse Weibull Distribution under Balanced Loss Function
Source: Hindawi journal article supplement (doi:10.1155/2021/6648462), 2021-03-25
Supplement: f1 [file 6648462.f1.pdf]

```

α = 1.383;
β = 3;
n = 10 000;
k = 3;
t = 0.7;
a = 2;
b = 1;
c = 0.5;
z = 3;
s1 = 0;
s2 = 0;
s3 = 0;
s4 = 0;
s5 = 0;
s6 = 0;
s7 = 0;
s8 = 0;
s9 = 0;
s10 = 0;
s11 = 0;
s12 = 0;
s13 = 0;
s14 = 0;
s15 = 0;
s16 = 0;
s17 = 0;
s18 = 0;
s19 = 0;
s20 = 0;
w = 0.2;

IT = 10 000;
R = 1 - Exp[-α * t^-β];
For[i = 1, i ≤ IT, i++,

  x = Table[ $\left(-\frac{1}{\alpha} \text{Log}[\text{Random}[]]\right)^{-\frac{1}{\beta}}$ , {n}];

  maxima[x_] := Union[Rest[FoldList[Min, x[[1]], x]]];
  tt = maxima[x];
  g = Length[tt];
  ttt = Sort[tt, Greater];
  If[g ≥ k, d = ttt[[k]], d = Min[{ttt}]];
  V = b + d^-β;
  αmL = k * d^β;
  s1 += (αmL - α)^2;
  αSE =  $\frac{a + k}{V}$ ;
  s2 += (αSE - α)^2;
  αLinex =  $\frac{k + a}{c} \text{Log}\left[\left(\frac{c + V}{V}\right)\right]$ ; s3 += (αLinex - α)^2;

```

```

I1 =  $\left(\frac{z+V}{V}\right)^{-k-a}$ ;
I2 =  $\left(\frac{(c+z)+V}{V}\right)^{-k-a}$ ;
 $\alpha\text{wLinex} = \frac{1}{c} \text{Log}\left[\frac{\left(\frac{z+V}{V}\right)^{-k-a}}{\left(\frac{(c+z)+V}{V}\right)^{-k-a}}\right]$ ; s4 +=  $(\alpha\text{wLinex} - \alpha)^2$ ;

mle1 =
  Minimize[ $\{(\alpha\text{mL} * h_1 + \alpha\text{SE} * h_2 - \alpha)^2, h_1 + h_2 == 1, 0 < h_1 < 1, 0 < h_2 < 1\}$ ,  $\{h_1, h_2\}$ ];
d1 = mle1[[1]]; dr1 = h1 /. mle1[[2, 1]];
dr2 = h2 /. mle1[[2, 2]];  $\alpha\text{seLP} = \alpha\text{mL} * \text{dr1} + \alpha\text{SE} * \text{dr2}$ ;
s5 +=  $(\alpha\text{seLP} - \alpha)^2$ ;

mle2 = Minimize[ $\left\{\left(-\frac{1}{c} \text{Log}\left[\text{Exp}[-\alpha\text{mL} * c]\right] * h_3 + h_4 * \left(1 + \frac{c}{V}\right)^{-a-k}\right) - \alpha\right\}^2$ ,
   $\{h_3 + h_4 == 1, 0 < h_3 < 1, 0 < h_4 < 1\}$ ,  $\{h_3, h_4\}$ ];
d2 = mle2[[1]]; dr3 = h3 /. mle2[[2, 1]];
dr4 = h4 /. mle2[[2, 2]];
 $\alpha\text{LinexLP} = -\frac{1}{c} \text{Log}\left[\text{Exp}[-\alpha\text{mL} * c] * \text{dr3} + \text{dr4} * \left(1 + \frac{c}{V}\right)^{-a-k}\right]$ ;
s6 +=  $(\alpha\text{LinexLP} - \alpha)^2$ ;

mle3 = Minimize[ $\left\{\left(\frac{1}{c} \text{Log}\left[\text{Exp}[-\alpha\text{mL} * c]\right] * h_5 + h_6 * \frac{\left(1 + \frac{z}{V}\right)^{-a-k}}{\left(1 + \frac{z+c}{V}\right)^{-a-k}}\right) - \alpha\right\}^2$ ,
   $\{h_5 + h_6 == 1, 0 < h_5 < 1, 0 < h_6 < 1\}$ ,  $\{h_5, h_6\}$ ];
d3 = mle3[[1]]; dr5 = h5 /. mle3[[2, 1]];
dr6 = h6 /. mle3[[2, 2]];

 $\alpha\text{wLinexLP} = \frac{1}{c} \text{Log}\left[\text{Exp}[-\alpha\text{mL} * c] * \text{dr5} + \text{dr6} * \frac{\left(1 + \frac{z}{V}\right)^{-a-k}}{\left(1 + \frac{z+c}{V}\right)^{-a-k}}\right]$ ;

s7 +=  $(\alpha\text{wLinexLP} - \alpha)^2$ ;
 $\alpha\text{seW} = \alpha\text{mL} * w + \alpha\text{SE} * (1 - w)$ ;
s8 +=  $(\alpha\text{seW} - \alpha)^2$ ;

 $\alpha\text{INEXW} = -\frac{1}{c} \text{Log}\left[\text{Exp}[-\alpha\text{mL} * c] * w + (1 - w) * \left(1 + \frac{c}{V}\right)^{-a-k}\right]$ ;
s9 +=  $(\alpha\text{INEXW} - \alpha)^2$ ;

 $\alpha\text{WINEXW} = \frac{1}{c} \text{Log}\left[\text{Exp}[-\alpha\text{mL} * c] * w + (1 - w) * \frac{\left(\frac{z+V}{V}\right)^{-k-a}}{\left(\frac{(c+z)+V}{V}\right)^{-k-a}}\right]$ ;

s10 +=  $(\alpha\text{WINEXW} - \alpha)^2$ ;

RML =  $1 - \text{Exp}[-\alpha\text{mL} * t^{-\beta}]$ ; s11 +=  $(\text{RML} - R)^2$ ;

RSE =  $1 - \left(\frac{V}{V + t^{-\beta}}\right)^{a+k}$ ; s12 +=  $(\text{RSE} - R)^2$ ;

f =  $\text{Log}\left[E^{-c} + E^{-c} * V^{a+k} * \text{Sum}\left[\frac{c^i}{\text{Gamma}[i+1]} (V + i t^{-\beta})^{-k-a}, \{i, 1, \text{Infinity}\}\right]\right]$ ;

```

```

Rlinex =  $\frac{-1}{c} * f$ ;
s13 += (Rlinex - R) ^ 2;
RWINEX =

$$\frac{1}{c} * \text{Log} \left[ \left( E^{-z} + E^{-z} * V^{(a+k)} * \text{Sum} \left[ \frac{(z)^i}{\text{Gamma}[i+1]} (V+i t^{-\beta})^{-k-a}, \{i, 1, \text{Infinity}\} \right] \right) / \right.$$


$$\left. \left( E^{-(c+z)} + E^{-(c+z)} * V^{(a+k)} * \text{Sum} \left[ \frac{(c+z)^i}{\text{Gamma}[i+1]} (V+i t^{-\beta})^{-k-a}, \{i, 1, \text{Infinity}\} \right] \right) \right]$$
;
s14 += (RWINEX - R) ^ 2;
mle4 =
Minimize[{{(RML * h7 + RSE * h8 - R) ^ 2, h7 + h8 == 1, 0 < h7 < 1, 0 < h8 < 1}, {h7, h8}}];
d4 = mle4[[1]]; dr7 = h7 /. mle4[[2, 1]];
dr8 = h8 /. mle4[[2, 2]]; RSELP = RML * dr7 + RSE * dr8;
s15 += (RSELP - R) ^ 2;

mle5 =
Minimize[{{( (-1/c * Log[(Exp[-RML * c]) * h9 + h10 * E^-c + E^-c * V^(a+k) * Sum[ (c)^i / Gamma[i+1] (V+i t^-beta)^-k-a, {i, 1, Infinity} ]]) - R) ^ 2, h9 + h10 == 1, 0 < h9 < 1, 0 < h10 < 1}, {h9, h10}}];
d5 = mle5[[1]]; dr9 = h9 /. mle5[[2, 1]];
dr10 = h10 /. mle5[[2, 2]];

RLinexLP = -1/c * Log[(Exp[-RML * c]) * dr9 + dr10 * E^-c +
E^-c * V^(a+k) * Sum[ (c)^i / Gamma[i+1] (V+i t^-beta)^-k-a, {i, 1, Infinity} ]];
s16 += (RLinexLP - R) ^ 2;

mle6 = Minimize[
{((1/c * Log[(Exp[-RML * c]) * h11 + h12 * ((E^-z + E^-z * V^(a+k) * Sum[ (z)^i / Gamma[i+1] (V+i t^-beta)^-k-a, {i, 1, Infinity} ]]) / (E^{-(c+z)} + E^{-(c+z)} * V^(a+k) * Sum[ (c+z)^i / Gamma[i+1] (V+i t^-beta)^-k-a, {i, 1, Infinity} ]])) - R) ^ 2, h11 + h12 == 1, 0 < h11 < 1, 0 < h12 < 1}, {h11, h12}}];
d6 = mle6[[1]]; dr11 = h11 /. mle6[[2, 1]];
dr12 = h12 /. mle6[[2, 2]];

RLinexLP = 1/c * Log[(Exp[-RML * c]) * dr11 + dr12 *

```

```

      ( ( E^-z + E^-z * V^(a+k) * Sum [ (z)^i / Gamma[i+1] (V+i t^-beta)^-k-a, {i, 1, Infinity} ] ) ) /
      ( E^-(c+z) + E^-(c+z) * V^(a+k) *
        Sum [ ((c+z))^i / Gamma[i+1] (V+i t^-beta)^-k-a, {i, 1, Infinity} ] ) ) );
s17 += (RWLineXP - R)^2;

RseW = RML * w + RSE * (1 - w);
s18 += (RseW - R)^2;

RLIenxw = - 1/c Log [ (Exp[-RML * c]) * w + (1 - w) * E^-c +
  E^-c * V^(a+k) * Sum [ (c)^i / Gamma[i+1] (V+i t^-beta)^-k-a, {i, 1, Infinity} ] ];
s19 += (RLIenxw - R)^2;

RWLineXPw = 1/c Log [ (Exp[-RML * c]) * w + (1 - w) *
  ( ( E^-z + E^-z * V^(a+k) * Sum [ (z)^i / Gamma[i+1] (V+i t^-beta)^-k-a, {i, 1, Infinity} ] ) ) /
  ( E^-(c+z) + E^-(c+z) * V^(a+k) *
    Sum [ ((c+z))^i / Gamma[i+1] (V+i t^-beta)^-k-a, {i, 1, Infinity} ] ) ) );
s20 += (RWLineXPw - R)^2;

Print["k =", k];
Print["c =", c];
Print["w =", w];
Print["z =", z];
Print[" α ml =", s1 / IT];
Print[" α se =", s2 / IT];
Print["α linex =", s3 / IT];
Print[" α wlinex =", s4 / IT];
Print[" α selp=", s5 / IT];
Print[" α LINXlp=", s6 / IT];
Print[" α wLINXlp=", s7 / IT];
Print[" α sew=", s8 / IT];
Print[" α linex w=", s9 / IT];
Print[" α wlinex w=", s10 / IT];

Print[" reliability =", reliability];
Print[" R ml =", s11 / IT];
Print[" R se =", s12 / IT];
Print["R linex =", s13 / IT];
Print[" R wlinex =", s14 / IT];
Print[" R selp=", s15 / IT];
Print[" R LINXlp=", s16 / IT];
Print[" R wLINXlp=", s17 / IT];

```

```
Print[" R sew=", s18 / IT];  
Print[" R linexw=", s19 / IT];  
Print[" R wlinex w=", s20 / IT];
```
